# Supplementary material for: Direct potentiometric bicarbonate/carbon dioxide sensing based on polymeric membranes doped with selective meso-bisubstituted calix[4]pyrrole ionophores
Source: Royal Society of Chemistry journal article supplement (doi:10.1039/d4ay00405a), 2024-01-01
Supplement: d4ay00405a1.pdf [file d4ay00405a1.pdf]

1 Full geometry optimizations in aqueous solution were performed to locate all the  
2 stationary points, using the B3LYP method,<sup>1</sup> with the 6-31+G(d,p) basis set for all the  
3 atoms,<sup>2-3</sup> namely B3LYP/6-31+G(d,p). Dispersion corrections were computed with  
4 Grimme's D3(BJ)<sup>4</sup> method in optimization. The intrinsic reaction coordinate path was  
5 traced to check the energy profiles connecting each transition state to two associated  
6 minima of the proposed mechanism.<sup>5</sup> All geometry calculations were run with the  
7 Gaussian 09 program.<sup>6</sup> ESP analysis<sup>7</sup> was performed on the molecular van der Waals  
8 surface.

9

10 Ionophore 1: <sup>1</sup>H NMR (500 MHz, CD<sub>3</sub>CN): δ [ppm] 8.00 (s, 4H), 7.93 (s, 2H), 5.90 (m,  
11 4H), 5.81 (m, 4H), 4.16 (q, *J* = 7.0 Hz, 4H), 2.69 (q, *J* = 7.5 Hz, 4H), 1.85 (s, 6H), 1.65 (s,  
12 6H), 1.62 (s, 6H), 1.51 (s, 6H), 1.23 (t, *J* = 7.0 Hz, 6H), 1.07 (t, *J* = 7.5 Hz, 6H). <sup>13</sup>C  
13 NMR (125 MHz, CD<sub>3</sub>CN): δ [ppm] 161.51 140.30, 138.60, 135.61, 135.25, 116.86,  
14 115.80, 106.06, 104.05, 60.27, 41.61, 35.69, 30.41, 27.40, 25.45, 18.67, 15.38, 14.65,  
15 9.44.

16 Ionophore 2: <sup>1</sup>H NMR (300 MHz, CD<sub>3</sub>CN): δ [ppm] 11.80 (s, 2H), 9.68 (s, 4H), 7.51 (t,  
17 *J* = 6.63 Hz, 2H), 7.41 (d, *J* = 6.58 Hz, 4H), 7.12 (m, 4H), 5.75 (t, *J* = 2.90 Hz, 4H), 5.66  
18 (t, *J* = 2.00 Hz, 4H), 2.04 (s, 6H), 1.61 (s, 6H), 1.52 (s, 6H). <sup>13</sup>C NMR (100 MHz,  
19 CD<sub>3</sub>CN): δ [ppm] 160.18, 140.84, 136.08, 123.99, 119.12, 105.99, 104.72, 42.34, 36.36,  
20 29.68, 25.59.

21 Ionophore 3: <sup>1</sup>H NMR (300 MHz, CD<sub>3</sub>CN): δ [ppm] 10.41 (s, 4H), 7.60 (m, 4H),  
22 7.56 (m, 4H), 6.03 (m, 4H), 5.89 (m, 4H), 3.42 (s, 12H), 2.23 (s, 6H), 1.78 (s, 6H),  
23 1.61 (s, 6H). <sup>13</sup>C NMR (100 MHz, (CD<sub>3</sub>)<sub>2</sub>CO): δ [ppm] 156.74, 142.42, 134.41,  
24 133.18, 128.90 114.55, 107.56, 107.20, 42.99, 37.28, 33.60, 32.99, 23.57.

25

## 26 **EXPERIMENTAL SECTION**

27 The ion chromatography experiments were performed on an ICS-5000 system  
28 (Thermo Scientific Dionex, Sunnyvale, CA, USA) equipped with two pumps. IC  
29 separation was performed using a capillary column (Optimix C18/SCX, 2.1 mm×30

1 mm×3 um, Agela Technologies) and conductivity detection; the flow rate of MSA  
2 eluent was 0.2 mL/min at 30°C; the injection volume was 50 μL<sup>8</sup>.

3 The three mineral water samples are obtained from our lab, Coke and Sprite  
4 samples are bought from a local supermarket. After sampled, the detection was  
5 conducted in a sealed cup within 3 minutes to decrease the influence from the air.

6

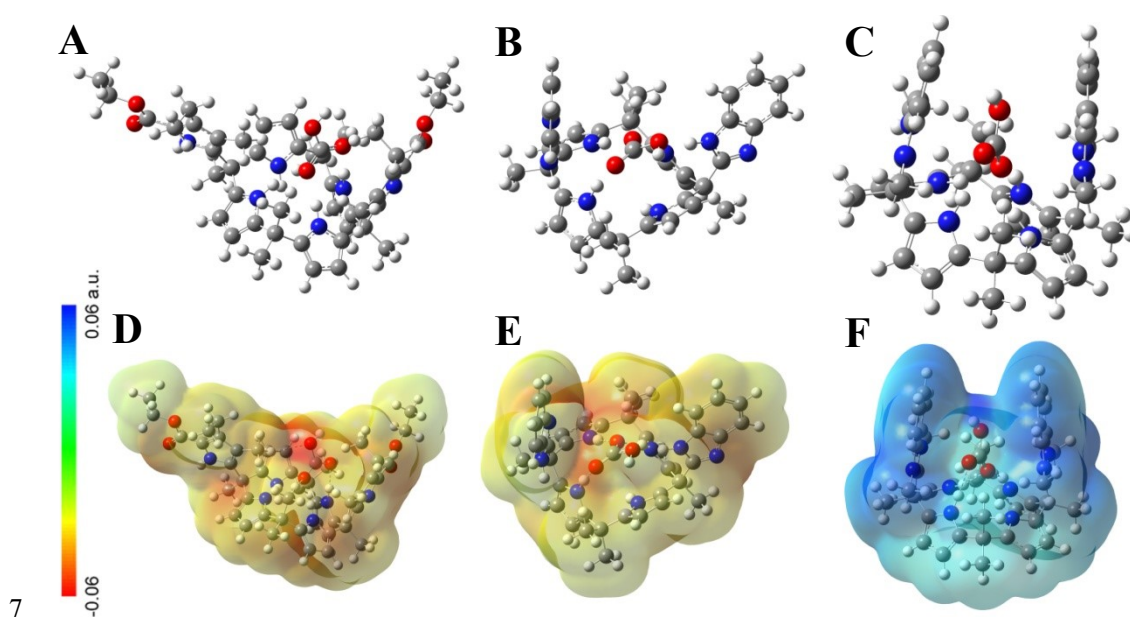

8 **Figure S1.** The geometries (A ionophore 1-HCO<sub>3</sub><sup>-</sup>, B ionophore 2-HCO<sub>3</sub><sup>-</sup>, C  
9 ionophore 3-HCO<sub>3</sub><sup>-</sup>) and ESP (D ionophore 1-HCO<sub>3</sub><sup>-</sup>, E ionophore 2-HCO<sub>3</sub><sup>-</sup>, F  
10 ionophore 3-HCO<sub>3</sub><sup>-</sup>) of ionophores-HCO<sub>3</sub><sup>-</sup> complexes. The white, gray, red and blue  
11 balls denote H, C, O and N atoms.

12

13

14

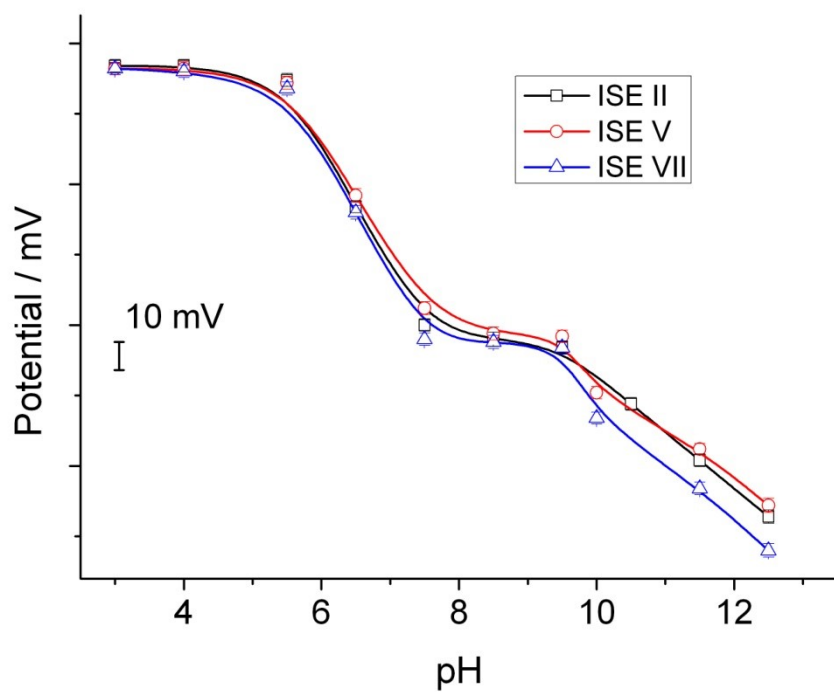

1

2 **Figure S2.** Effects of pH on the potential responses of the proposed ISEs in 1 mM  
3  $\text{HCO}_3^-$  aqueous solutions.

4

5

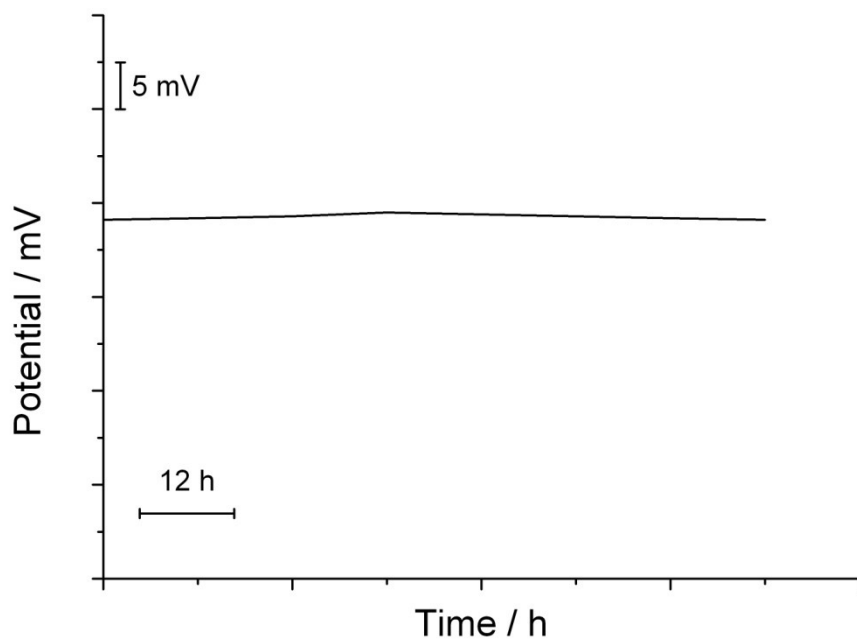

1

2

**Figure S3** Potential trace of the proposed ISE VII in a period of 72 h.

3

**Table S1.** Data (ISE VII) for the slopes, detection limits (DL) and selectivity coefficients in a period of 3 months.

| ISEs | Day | Slope<br>mV/decade | DL (M)             | Log $K^{\text{pot}}$ , bicarbonate X- |                  |                              |                 |                 |                                             |
|------|-----|--------------------|--------------------|---------------------------------------|------------------|------------------------------|-----------------|-----------------|---------------------------------------------|
|      |     |                    |                    | Sal <sup>-</sup>                      | SCN <sup>-</sup> | NO <sub>3</sub> <sup>-</sup> | Br <sup>-</sup> | Cl <sup>-</sup> | H <sub>2</sub> PO <sub>4</sub> <sup>-</sup> |
| XVII | 1   | 59.2               | $5 \times 10^{-7}$ | 3.5                                   | -1.0             | -1.5                         | -3.1            | -2.8            | -4.0                                        |
|      | 20  | 59.0               | $5 \times 10^{-7}$ | 3.5                                   | -1.0             | -1.5                         | -3.1            | -2.8            | -4.0                                        |
|      | 50  | 59.0               | $5 \times 10^{-7}$ | 3.5                                   | -1.0             | -1.5                         | -3.0            | -2.8            | -4.0                                        |
|      | 70  | 58.5               | $5 \times 10^{-7}$ | 3.5                                   | -1.0             | -1.5                         | -3.0            | -2.8            | -3.9                                        |
|      | 90  | 58.0               | $5 \times 10^{-7}$ | 3.5                                   | -1.0             | -1.5                         | -3.0            | -2.8            | -3.9                                        |

**Table S2** Statistical analysis of the results from our sensors and Chromatography

| Samples         | Levene's Test for     | t-test for Equality | /                         |
|-----------------|-----------------------|---------------------|---------------------------|
|                 | Equality of Variances | of Means            |                           |
| Mineral water 1 | 0.609                 | 0.138               | No significant difference |
| Mineral water 2 | 0.422                 | 0.055               | No significant difference |
| Mineral water 3 | 0.192                 | 0.057               | No significant difference |
| Coke            | 0.751                 | 0.188               | No significant difference |
| Sprite          | 0.770                 | 0.109               | No significant difference |

## References

1. Adamo, C.; Barone, V. Toward Reliable Density Functional Methods without Adjustable Parameters: The PBE0 Model. *J. Chem. Phys.* **1999**, 110, 6158–6170.
2. Krishnan, R.; Binkley, J. S.; Seeger, R.; Pople, J. A. Selfconsistent Molecular Orbital Methods. XX. A Basis Set for Correlated Wave Functions. *J. Chem. Phys.* **1980**, 72, 650–654.
3. Xu S., He T., Li J., Huang Z., & Hu C., Enantioselective synthesis of D-lactic acid via chemocatalysis using MgO: Experimental and molecular-based rationalization of the triose's reactivity and preliminary insights with raw biomass. *Appl. Catal. B: Environ.* **2021**, 292:120145.
4. Grimme, S.; Antony, J.; Ehrlich, S.; Krieg, H., A consistent and accurate ab initio parametrization of density functional dispersion correction (DFT-D) for the 94 elements H-Pu. *J. Chem. Phys.* **2010**, 132 (15), 154104.
5. Gonzalez, C.; Schlegel, H. B. An improved algorithm for reaction path following. *J. Chem. Phys.* **1989**, 90, 2154–2161.
6. Frisch, M. J.; Trucks, G. W.; Schlegel, H. B.; Scuseria, G. E.; Robb, M. A.; Cheeseman, J. R.; Scalmani, G.; Barone, V.; Mennucci, B.; Petersson, G. A.; Nakatsuji, H.; Caricato, M.; Li, X.; Hratchian, H. P.; Izmaylov, A. F.; Bloino, J.; Zheng, G.; Sonnenberg, J. L.; Hada, M.; Ehara, M.; Toyota, K.; Fukuda, R.; Hasegawa, J.; Ishida, M.; Nakajima, T.; Honda, Y.; Kitao, O.; Nakai, H.; Vreven, T.; Montgomery, J. A.; Peralta, J. J. E.; Ogliaro, F.; Bearpark, M.; Heyd, J. J.; Brothers, E.; Kudin, K. N.; Taroverov, V. N.; Keith, T.; Kobayashi, R.; Normand, J.; Raghavachari, K.; Rendell, A.; Burant, J. C.; Iyengar, S. S.; Tomasi, J.; Cossi, M.; Rega, N.; Millam, J. M.; Klene, M.; Knox, J. E.; Cross, J. B.; Bakken, V.; Adamo, C.; Jaramillo, J.; Gomperts, R.; Stratmann, R. E.; Yazyev, O.; Austin, A. J.; Cammi, R.; Pomelli, C.; Ochterski, J. W.; Martin, R. L.; Morokuma, K.; Zakrzewski, V. G.; Voth, G. A.; Salvador, P.; Dannenberg, J. J.; Dapprich, S.; Daniels, A. D.; Farkas, O.; Foresman, J. B.; Ortiz, J. V.; Cioslowski, J.; Fox, D. J. Gaussian 09, Revision D.01; Gaussian Inc.: Wallingford, CT, 2013.
7. Murray, J. S.; Politzer, P., The electrostatic potential: an overview. *WIRS Comput. Mol.*

*Sci.* **2011**, 1 (2), 153-163.

8. A. Xu, X. Wang, Y. Fa, Y. Liu, F. Li, H. Huang, Z. Wang, Determination of bicarbonate in fermentation of cyanobacterial by non-suppress ion chromatography. *Adv. J. Food Sci. Technol.* 13 (2017) 7-10.
